# Supplementary material for: (E)3-2-(1-(2,4-Dihydroxyphenyl)ethyldeneamino)phenyl)-2-methylquinazoline-4(3H)-one Schiff Base and Its Metal Complexes: A New Drug of Choice against Methicillin-ResistantStaphylococcus aureus
Source: Hindawi journal article supplement (doi:10.1155/2014/343540), 2014-01-01
Supplement: f1 [file 343540.f1.pdf]

Supplimentary file 1.

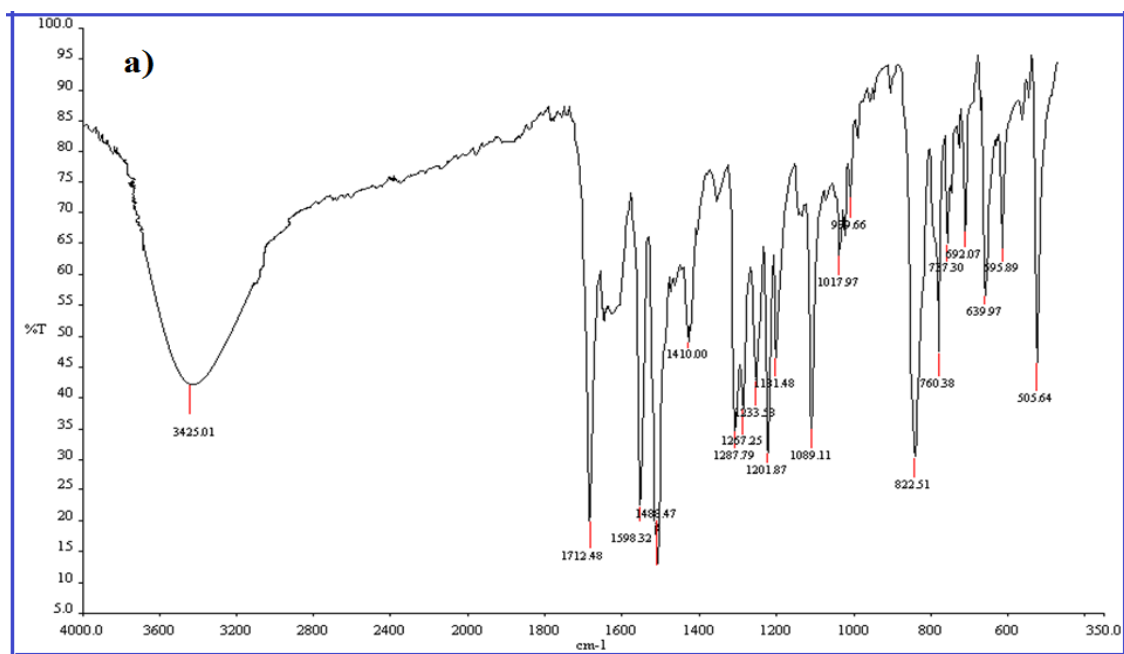

a) IR Spectra of Schiff base (DHPEAPMQ).

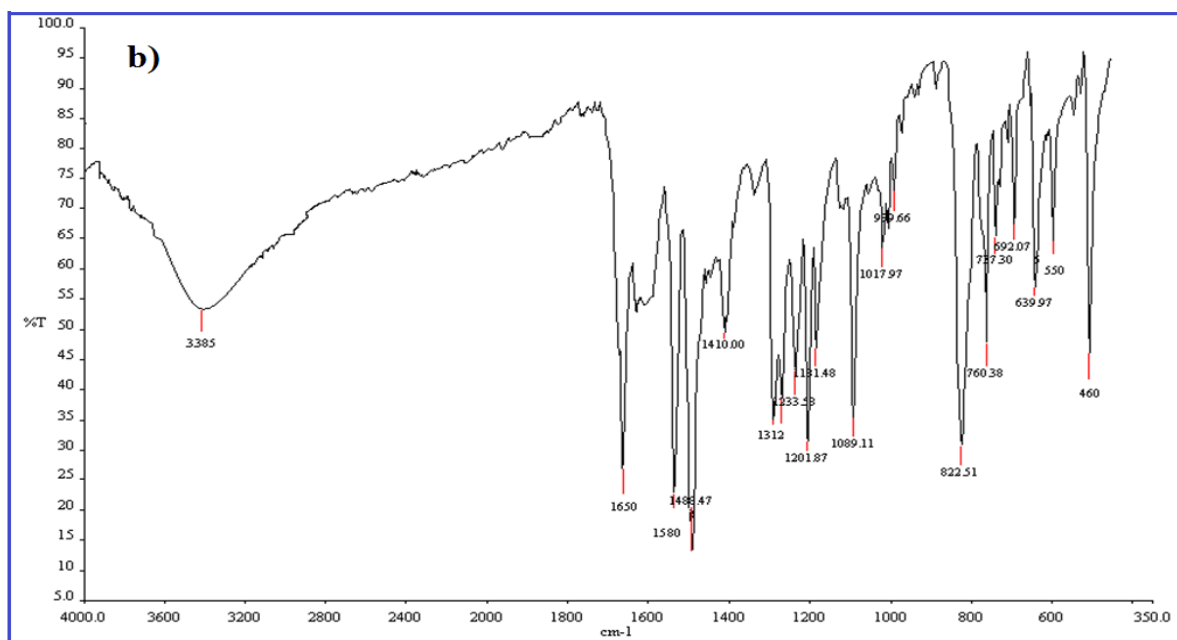

b) IR spectra of Cu(II) complex.

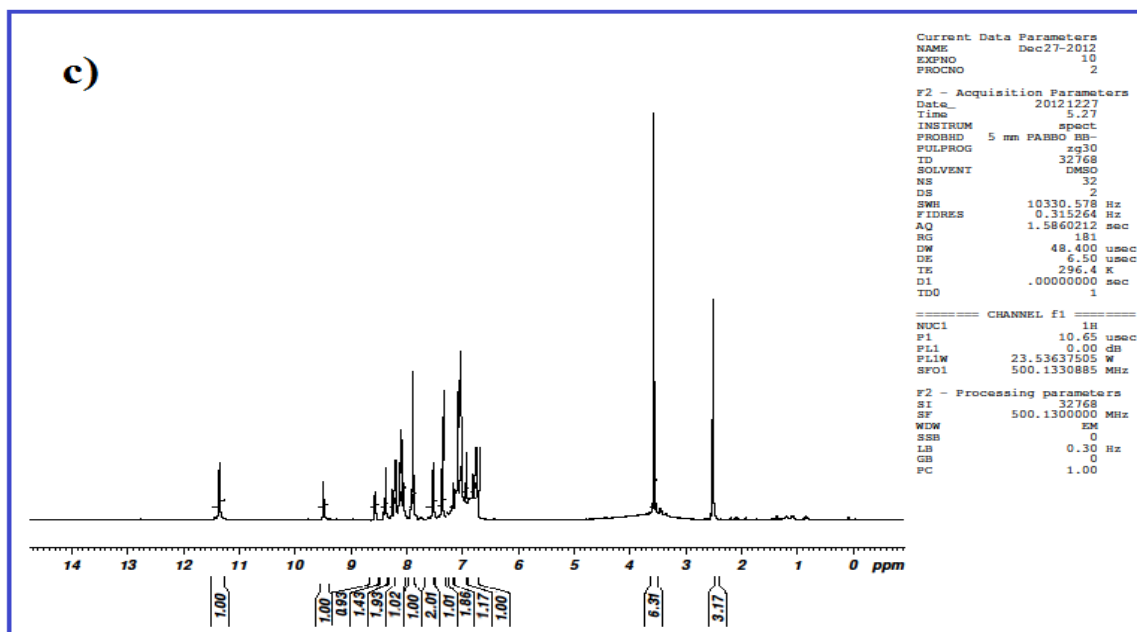

c) NMR spectra of Schiff base (DHPEAPMQ).

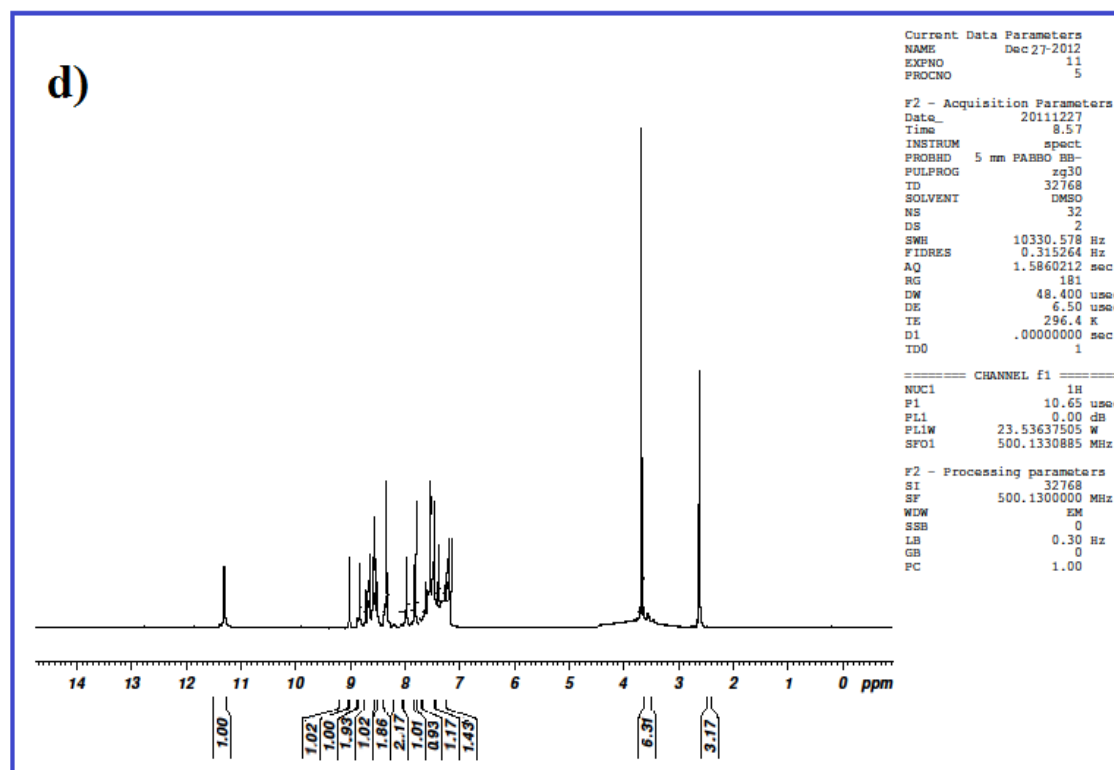

d) NMR spectra of Zn(II) complex.

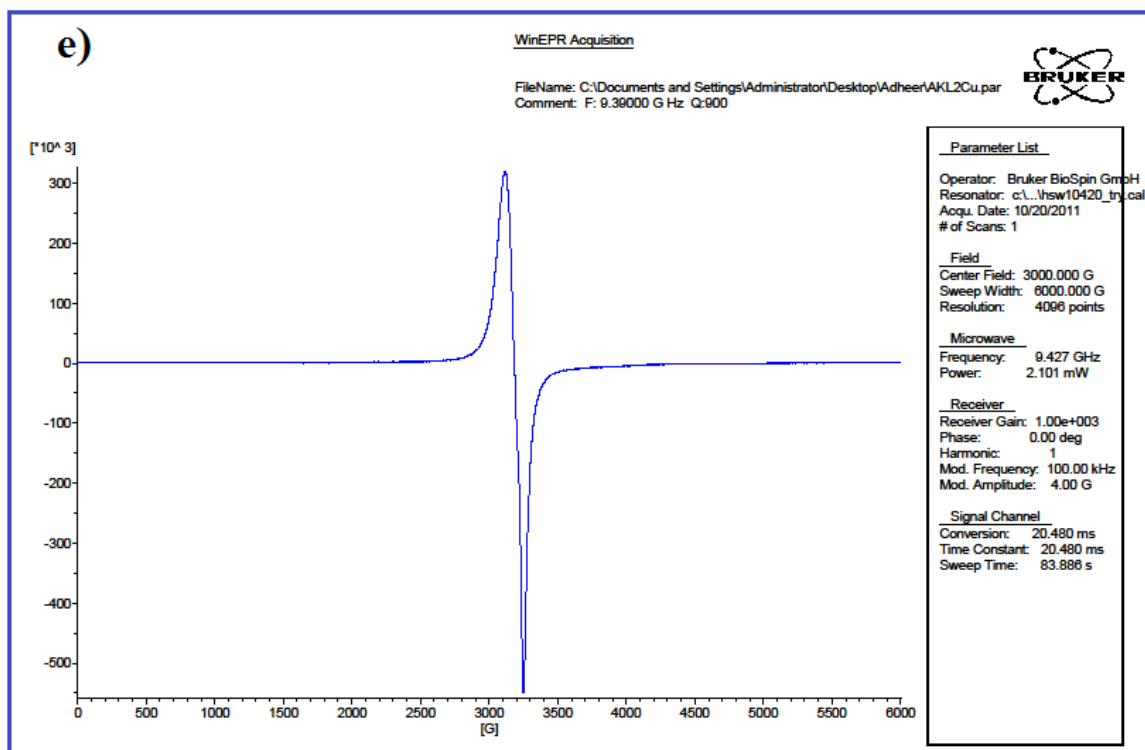

e) ESR spectra of Cu(II) complex.
